# Supplementary material for: A transposase strategy for creating libraries of circularly permuted proteins
Source: PubMed Central journal article supplement — Nucleic Acids Res. 2012 Feb 7;40(9):e71. doi: 10.1093/nar/gks060 (PMC3351165; doi:10.1093/nar/gks060), 2012-02-07

## SUPPLEMENTAL DATA

**Sequence of pKO3-NotI.** The NotI site is red, the temperature sensitive replication origin is purple, and the antibiotic resistance cassette (*cat<sup>R</sup>*) is cyan.

**GGGGCCGC**GATATCTAACGGTGAACAGTTGTTCTACTTTTTGTTTGTAGTCTTGATGCTTCACTGATAGA  
TACAAGAGCCATAAGAACCTCAGATCCTTCCGTATTTAGCCAGTATGTTCTCTAGTGTGGTTCGTTGTTT  
TTGCGTGAGCCATGAGAACGAACCATGAGATCATGCTTACTTTGCATGTCACTCAAAAATTTTGCCTCA  
AAACTGGTGAGCTGAATTTTTGCAGTTAAAGCATCGTGTAGTGTTTTTCTTAGTCCGTTACGTAGGTAGG  
AATCTGATGTAATGGTTGTTGGTATTTTTGTCACCATTCAATTTTTATCTGGTTGTTCTCAAGTTCGGTTAC  
GAGATCCATTTGTCTATCTAGTTCAACTTGGAAAAATCAACGTATCAGTCGGGCGGCCCTCGCTTATCAACC  
ACCAATTTTCATATTGCTGTAAGTGTTTAAATCTTTACTTATTGGTTTCAAACCCATTGGTTAAGCCTTT  
TAAACTCATGGTAGTTATTTTTCAAGCATTAAACATGAACTTAAATTCATCAAGGCTAATCTCTATATTTGC  
CTTGTGAGTTTTCTTTTGTGTTAGTTCTTTTAATAACCACTCATAAATCCTCATAGAGTATTTGTTTTCA  
AAAGACTTAACATGTTCCAGATTATATTTTTATGAATTTTTTTAACTGGAAAAGATAAGGCAATATCTCTT  
CACTAAAACTAATTCATAATTTTTCGCTTGAGAACTTGGCATAAGTTTGTCCACTGGAAAATCTCAAAGCC  
TTTAACCAAAGGATTCCTGATTTCCACAGTTCTCGTCATCAGCTCTCTGGTTGCTTTAGCTAATACACCA  
TAAGCATTTTCCCTACTGATGTTTCATCATCTGAGCGTATTGGTTATAAGTGAACGATACCGTCCGTTCTT  
TCCTTGTAGGGTTTTCAATCGTGGGTTGAGTAGTGCCACACAGCATAAAATTAGCTTGGTTTTCATGCTC  
CGTTAAGTCATAGCGACTAATCGCTAGTTCATTTGCTTTGAAAACAATAATTCAGACATACATCTCAAT  
TGGTCTAGGTGATTTTAATCACTATAACCAATTGAGATGGGCTAGTCAATGATAATTACTAGTCCTTTTCC  
TTTGAGTTGTGGGTATCTGTAAATCTGCTAGACCTTTGCTGGAAAACCTGTAAATCTGCTAGACCCTC  
TGTAATTTCCGCTAGACCTTTGTGTGTTTTTTTTTGTTTATATTCAAGTGGTTATAATTTATAGAATAAAG  
AAAGAATAAAAAAAGATAAAAAAGAATAGATCCCAGCCCTGTGTATAACTCACTACTTTAGTCAGTTCCGC  
AGTATTACAAAAGGATGTCGCAAACGCTGTTTGCTCCTCTACAAAACAGACCTTAAAACCCTAAAGGCTT  
AAGTAGCACCCCTCGCAAGCTCGGGCAAATCGCTGAATATTCCTTTTGTCTCCGACCATCAGGCACCTGAG  
TCGCTGTCTTTTTCGTGACATTCAGTTCGCTGCGCTCACGGCTCTGGCAGTGAATGGGGGTAAATGGCAC  
TACAGGCGCCTTTTATGGATTTCATGCAAGGAACTACCCATAATACAAGAAAAGCCCGTCACGGGCTTCT  
CAGGGCGTTTTATGGCGGGTCTGCTATGTGGTGCTATCTGACTTTTTGCTGTTTCAGCAGTTCCTGCCCTC  
TGATTTTCCAGTCTGACCACTTCGGATTATCCCCTGACAGGTCAATCAGACTGGCTAATGCACCCAGTAA  
GGCAGCGGTATCATCAACAGGCTTACCCGCTTACTGTCTCNGGATCGACGCTCTCCCTTATGCGACTCCTG  
CATCCCTTTCGTCTTCGAATAAATACCTGTGACGGAAGATCACTTCGCAGAATAAATAAATCCTGGTGTC  
CCTGTTGATACCGGAAGCCCTGGGCCAACTTTTGGCGAAAATGAGACGTTGATCGGCACGTAAGAGGTT  
CCAACTTTACCATAATGAAATAAGATCACTACCGGGCGTATTTTTTTGAGTTATCGAGATTTTTCAGGAGC  
TAAGGAAGCTAAAATGGAGAAAAAAATCACTGGATATAACCACCGTTGATATATCCAATGGCATCGTAAA  
GAACATTTTGAGGCATTTTCAGTCAGTTGCTCAATGTACCTATAACCAGACCGTTCAGCTGGATATTACGG  
CCTTTTTAAAGACCGTAAAGAAAAATAAGCACAAGTTTTATCCGGCCTTTATTCACATTCCTTGCCCGCCT  
GATGAATGCTCATCCGGAATTCGTATGGCAATGAAAGACGGTGAGCTGGTGATATGGGATAGTGTTCAC  
CCTTGTTACACCGTTTTCCATGAGCAAACGTTTTCATCGCTCTGGAGTGAATACCACGACGATT  
TCCGGCAGTTTCTACACATATATTCGCAAGATGTGGCGTGTACGGTGAAAACCTGGCCTATTTCCCTAA  
AGGGTTTATTGAGAATATGTTTTTCGTCTCAGCCAATCCCTGGGTGAGTTTACCAGTTTTGATTTAAAC  
GTGGCCAATATGGACAACTTCTTCGCCCCGTTTTACCATGGGCAAATATTATACGCAAGGCGACAAG  
TGCTGATGCCGCTGGCGATTTCAGGTTTCATCATGCCGTTTGTGATGGCTTCCATGTCCGCAGAATGCTTAA  
TGAATTACAACAGTACTGCGATGAGTGGCAGGGCGGGCGTAAATTTTTTAAAGGCAGTTATTGGTGCCCT  
TAAACG

**Sequence of pMM1.** NotI sites are in blue, *adk* gene encoding TnAK is in red, and the extra base pair added so that the final linker is in frame is yellow.

**CGGCGCGC**aATGATGGCTTATCTGGTGTTCCTCGGACCTCCAGGGGCCGAAAAGGTACGTACGCAAAGC  
GAATCCAAGAAAAGACGGGTATTCATATATCCACCGGCGACATCTTCAGAGATATTGTGAAGAAAGA  
AAACGATGAACCTTGAAAGAAAATAAAGGAGATAATGGAAAAGGGAGAAGCTGGTTCCTGATGAACTGGTG  
AACGAGGTTGTGAAAAGAAGACTTTCAGAGAAAAGATTGTGAAAAGGGTTTCATTCTGGATGGGTATCCAA  
GGACCGTAGCCAGGCGGAGTTTCTCGACTCTTTCCTGGAATCCCAAACAAGCAACTCACAGCTGCCGT  
GCTTTTGTATGTTCCAGAGGACGTGGTTGTCCAGAGGCTCACCTCGAGAAGAATCTGCCCAAAGTGCGGT  
AGAATCTACAACATGATTTCACTTCCACAAAAGAAGACGAAGTGTGCGATGACTGTAAAGTAAAACCTCG  
TTCAGCGAGACGACGACAAAGAGGAAACGGTCAGACACAGATAACAAGTTTACCTCGAAAAAACAACC  
CGTGATAGACTATTACGGGAAAAAGGGTATCCTCAAAGAGTGGACGGCACGATAGGGATCGACAACGTG  
GTTGCCGAGGTACTCAAATAATAGGGTGGAGTGATAAAGCGCGCGATATCTAACGGTG  
AACAGTTGTTCTACTTTTGTGTTGTAGTCTTGATGCTTCACTGATAGATAACAAGCCATAAGAACCCTCA  
GATCCTTCCGTATTTAGCCAGTATGTTCTCTAGTGTGGTTCGTTGTTTTTTCGTGAGCCATGAGAACGAA  
CCATTGAGATCATGCTTACTTTGCATGTCCTCAAAAATTTTGCCTCAAAACTGGTGAGCTGAATTTTTG  
CAGTTAAAGCATCGTGTAGTGTGTTTTCTTAGTCCGTTACGTAGGTAGGAATCTGATGTAATGGTTGTTGG  
TATTTTGTCAACATTCATTTTTATCTGGTTGTTCTCAAGTTCGGTTACGAGATCCATTTGTCTATCTAGT  
TCAACTTGGAAAATCAACGTATCAGTCGGGCGGCCCTCGCTTATCAACCACCAATTTTCATATTGCTGTAAG  
TGTTTAAATCTTTACTTATTGGTTTCAAACCCATTGGTTAAGCCTTTTAAACTCATGGTAGTTATTTTC  
AAGCATTAAACATGAACTTAAATTCATCAAGGCTAATCTCTATATTTGCCTTGTGAGTTTTCTTTTGTGTT  
AGTCTTTTAAATAACCACTCATAAATCCTCATAGAGTATTTGTTTTCAAAGACTTAACATGTTCCAGAT  
TATATTTTATGAATTTTTTAACTGGAAAAGATAAGGCAATATCTCTTCACTAAAAACTAATTTCTAATTT  
TTCGCTTGAGAACTTGGCAGTATTGTTCCACTGGAAAATCTCAAAGCCTTTAACCAAAGGATTCCTGATT  
TCCACAGTCTCGTCATCAGCTCTCTGGTTGCTTTAGCTAATACACCATAAGCATTTTCCCTACTGATGT  
TCATCATCTGAGCGTATTGGTTATAAGTGAACGATACCGTCCGTTCTTTCCTTGTAGGGTTTTCAATCGT  
GGGGTTGAGTAGTGCCACACAGCATAAAATTAGCTTGGTTTCATGCTCCGTTAAGTCATAGCGACTAATC  
GCTAGTTCATTTGCTTTGAAAACAACATAATTCAGACATACATCTCAATTGGTCTAGGTGATTTTAATCAC  
TATACCAATTGAGATGGGCTAGTCAATGATAATTACTAGTCTTTTTCCTTTGAGTTGTGGGTATCTGTAA  
ATTTCTGCTAGACCTTTGCTGGAAAACCTGTAAATTTCTGCTAGACCTCTGTAAATTCGCTAGACCTTTG  
TGTGTTTTTTTTGTTTATATTCAAGTGGTTATAATTTATAGAATAAAGAAAGAAATAAAAAAGATAAAAA  
GAATAGATCCCAGCCCTGTGTATAACTCACTACTTTAGTCAAGTTCGCGAGTATTACAAAAGGATGTCGCA  
AACGCTGTTTGTCTCTTACAAAACAGACCTTAAAACCCTAAAGGCTTAAGTAGCACCTTCGCAAGCTCG  
GGCAAATCGCTGAATATTCCTTTTGTCTCCGACCATCAGGCACCTGAGTCGCTGTCTTTTTTTCGTGACATT  
CAGTTCGCTGCGCTCACGGCTCTGGCAGTGAATGGGGGTAAATGGCACTACAGGCGCCTTTTATGGATTCT  
ATGCAAGGAAACTACCCATAATACAAGAAAAGCCCGTCACGGGCTTCTCAGGGCGTTTTATGGCGGGTCT  
GCTATGTGGTGCTATCTGACTTTTTGCTGTTTCAAGCAGTTCCTGCCCTCTGATTTTCCAGTCTGACCATT  
CGGATTATCCCCTGACAGGTCATTCAGACTGGCTAATGCACCCAGTAAGGCAGCGGTATCATCAACAGGC  
TTACCCGCTTACTGTCNGGATCGACGCTCTCCCTTATGCGACTCCTGCATCCCTTTTCGTCTTCGAATAA  
ATACCTGTGACGGAAGATCACTTCGCAGAATAAAATAAATCCTGGTGTCCCTGTTGATACCGGGAAGCCCT  
GGGCCAACTTTTTGGCGAAAATGAGACGTTGATCGGCACGTAAGAGGTTCCAACCTTACCATAATGAAAT  
AAGATCACTACCGGGCGTATTTTTTGTGATTATCGAGATTTTTCAGGAGCTAAGGAAGCTAAAATGGAGAAA  
AAAATCACTGGATATACCACCGTTGATATATCCCAATGGCATCGTAAAGAACATTTTGGAGCATTTTCAGT  
CAGTTGCTCAATGTACCTATAACCAGACCGTTTCAGCTGGATATTACGGCCTTTTTTAAAGACCGTAAAGAA  
AAATAAGCACAAAGTTTTATCCGGCCTTTTATTACATTTCTTGCCTGATGAATGCTCATCCGGAATTC  
CGTATGGCAATGAAAGACGGTGAGCTGGTGTATGGGATAGTGTTCACCTTGTACACCGTTTTTCCATG  
AGCAAACGAAACGTTTTTCATCGCTCTGGAGTGAATACCACGACGATTTCCGGCAGTTTCTACACATATA  
TTCGCAAGATGTGGCGTGTACGGTAAAACCTGGCCTATTTCCCTAAAGGGTTTATTGAGAATATGTTT  
TTCGCTCTCAGCCAATCCCTGGGTGAGTTTTACCAGTTTTGATTTAAACGTTGGCCAATATGGACAACCTCT  
TCGCCCCGTTTTTACCATGGGCAAATATTATACGCAAGGCGACAAGGTGCTGATGCCGCTGGCGATTCA  
GGTTCATCATGCCGTTTGTGATGGCTTCCATGTTCGGCAGAATGCTTAATGAATTACAACAGTACTGCGAT  
GAGTGGCAGGGCGGGCGTAATTTTTTTAAAGGCAGTTATTGGTGCCCTTAAACG

**Sequence of pMT2.** BglII sites flanking the minitransposon (bold) are yellow, the stop codon designed to terminate translation of adjacent circularly permuted proteins is red, the MuA R1R2 binding sites are purple, the ribosomal binding site used to initiate translation of adjacent circularly permuted genes is in orange, and the start codon for translation of circularly permuted genes is green.

AGATCT**TGAGCGGGCGCACGAAAAACGCGAAAGCGTTTCACGATAAAATGCGAAAAA**AAAGGATCTCAAGAAG  
ATCCTTTGATTTTTCGGCTGCGGGGAGCGGTATCAGCTCACTCAAAGGCGGTAATACGGTTATCCACAGAA  
TCAGGGGATAACGCAGGAAAGAACATGTGAGCAAAGGCCAGCAAAGGCCAGGAACCGTAAAAAGGCCG  
CGTTGCTGGCGTTTTTCCATAGGCTCCGCCCCCTGACGAGCATCACAAAATCGACGCTCAAGTCAGAG  
GTGGCGAAACCCGACAGGACTATAAGATAACCAGGCGTTTTCCCCCTGGAAGCTCCCTCGTGCCTCTCCT  
GTTCCGACCCTGCCGCTTACCGGATACCTGTCCGCTTTTCTCCCTTCGGGAAGCGTGGCGCTTCTCATA  
GCTCACGCTGTAGGTATCTCAGTTCGGTGTAGGTCGTTTCGCTCCAAGCTGGGCTGTGTGCACGAACCCCC  
CGTTCAGCCCGACCGCTGCGCCTTATCCGGTAACTATCGTCTTGAGTCCAACCCGGTAAGACACGACTTA  
TCGCCACTGGCAGCAGCCACTGGTAACAGGATTAGCAGAGCGAGGTATGTAGGCGGTGCTACAGAGTTCT  
TGAAGTGGTGGCCTAACTACGGCTACACTAGAAGGACAGTATTTGGTATCTGCGCTCTGCTGAAGCCAGT  
TACCTTCGGAAAAAGAGTTGGTAGCTCTTGATCCGGCAAACAAACCACCGCTGGTAGCGGTGGTTTTTTTT  
GTTTGAAGCAGCAGATTACGCGCAGAAAAAAGGATCTCAAGAAGATCCTTTGATCTTTTCTACGGGGT  
CTGACGCTCAGTGAACGAAAACCTCACGTTAAGGGATTTTGGTCATGAACAATAAACTGTCTGCTTACA  
TAAACAGTAATAACAAGGGGTGTTATGAGCCATATTCAACGGGAAACGTCTTGCTCTAGGCCGCGATTAA  
TTCCAACATGGATGCTGATTTATATGGGTATAAATGGGCTCGCGATAATGTCCGGCAATCAGGTGCGACA  
ATCTATCGATTGTATGGGAAGCCCGATGCGCCAGAGTTGTTTTCTGAAACATGGCAAAGGTAGCGTTGCCA  
ATGATGTTACAGATGAGATGGTCAGACTAACTGGCTGACGGAATTTATGCCTCTCCGACCATCAAGCA  
TTTTATCCGTA CTCTGATGATGCATGGTTACTCACCCTGCGATCCCCGGGAAAACAGCATTCCAGGTA  
TTAGAAGAATATCCTGATTCAGGTGAAAATATTGTTGATGCGCTGGCAGTGTTCTGCGCCGGTTGCATT  
CGATTCCTGTTTGTAAATTGCTCTTTAACAGCGATCGCGTATTTCTGCTCTCGCTCAGGCGCAATCACGAAT  
GAATAACGGTTTGGTTGATGCGAGTGATTTTGTATGACGAGCGTAATGGCTGGCCTGTTGAACAAGTCTGG  
AAAGAAATGCATAAACTTTTGGCATTCTCACCAGGATTCAGTCGTCATCATGGTGATTTCTCACTTGATA  
ACCTTATTTTTGACGAGGGGAAATTAATAGGTTGTATTGATGTTGGACGAGTCGGAATCGCAGACCGATA  
CCAGGATCTTGCCATCCTATGGAACCTGCCTCGGTGAGTTTTCTCCTTCATTACAGAAACGGCTTTTTCAA  
AAATATGGTATTGATAATCCTGATATGAATAAATTGCAGTTTTCATTTGATGCTCGATGAGTTTTTCTA**AG**  
**GAGGT**CAGCTAT**GGTTTTTCGCATTTATCGTGAAACGCTTTTCGCGTTTTTTCGTGCGCCGCTCAA**AGATCTA  
ATGATGGCTTATCTGGTGTCTCGGACCTCCAGGGGCCGAAAAGGTACGTACGCAAAGCGAATCCAAG  
AAAAGACGGGTATTCCTCATATATCCACCGGCGACATCTTCAGAGATATTGTGAAGAAAGAAAACGATGA  
ACTTGAAAGAAAATAAAGGAGATAATGGAAGAGGAGAACTGGTTCCTGATGAACTGGTGAACGAGGTT  
GTGAAAAGAAGACTTTCAGAGAAAAGATTGTGAAAAGGGTTTCATTCGGATGGGTATCCAAGGACCGTAG  
CCCAGGCGGAGTTTCTCGACTCTTTCCTGGAATCCCAAACAAGCAACTCACAGCTGCCGTGCTTTTTTGA  
TGTTCCAGAGGACGTGGTTGTCCAGAGGCTCACCTCGAGAAGAACTGCCCCAAAGTGCGGTAGAACTTAC  
AACGTGATTTCACTTCAACCAAAAAGAAGACGAACTGTGCGATGACTGTAAAGTAAAACCTCGTTCAGCGAG  
ACGACGACAAAGAGGAAACGGTCAGACACAGATACAAGTTTTACCTCGAAAAAACTCAACCCGTGATAGA  
CTATTACGGGAAAAAGGTATCCTCAAAGAGTGGACGGCACGATAGGGATCGACAACGTGGTTGCCGAG  
GTACTCAAATAATAGGGTGGAGTGATAAATG

**Figure S1.** Growth of *E. coli* CV2 expressing full-length *T. neapolitana* AK using the minitransposon.

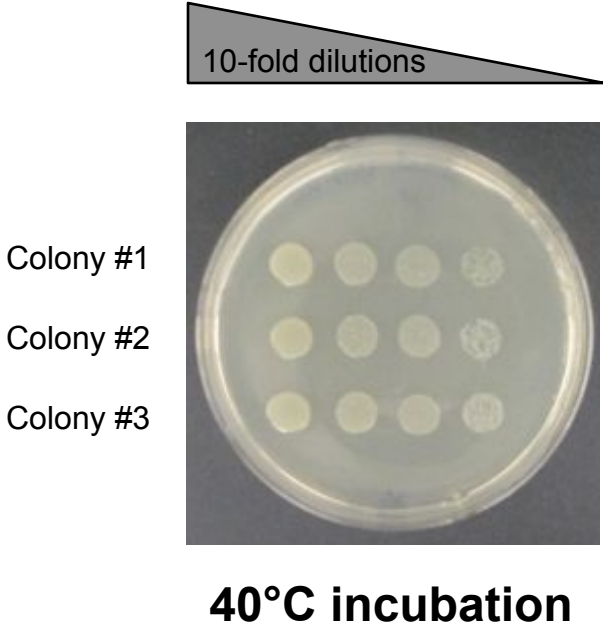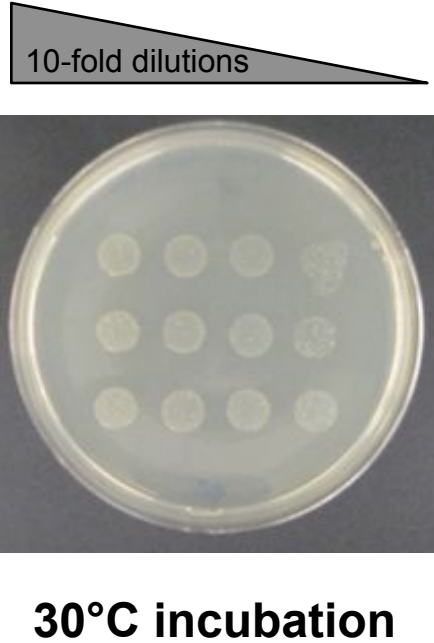

**Figure S2.** Growth of *E. coli* CV2 transformed with a circularized minitransposon that lacks the *adk* gene.

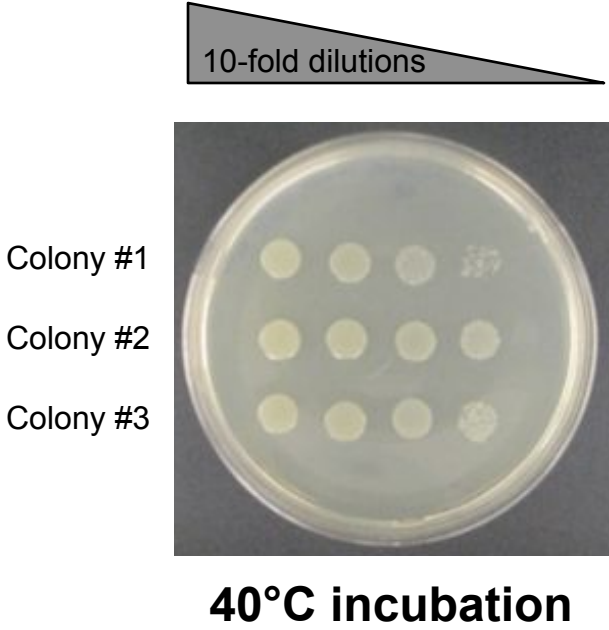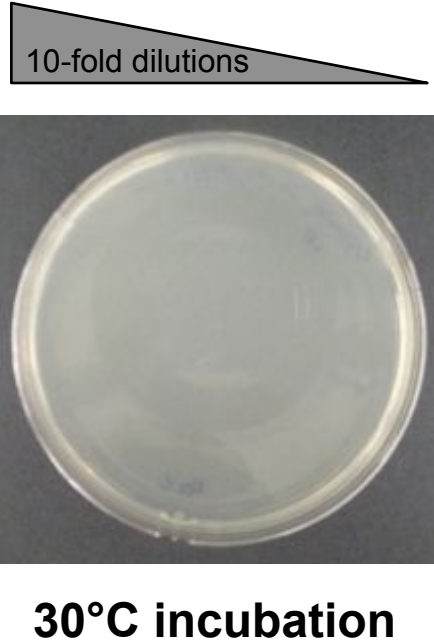

**Figure S3.** Growth of *E. coli* CV2 transformed with a vector that expresses AK residues 26-220 fused to 1-26.

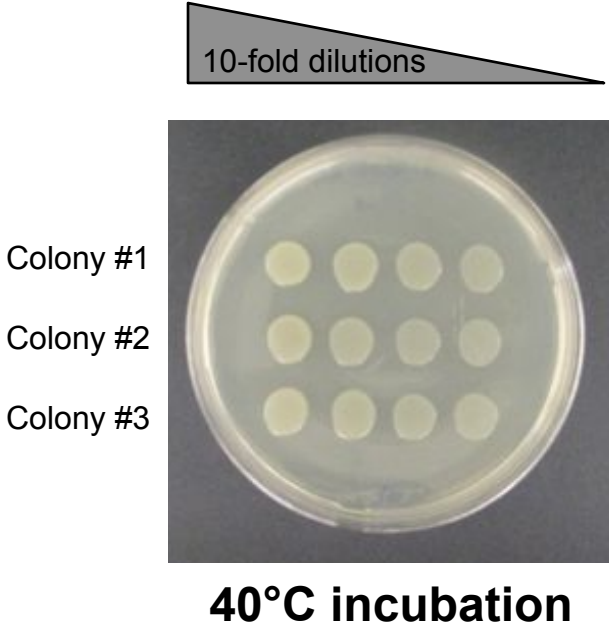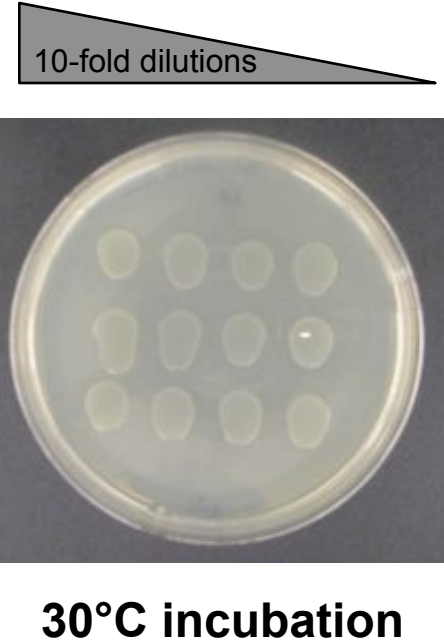

**Figure S4.** Growth of *E. coli* CV2 transformed with a vector that expresses AK residues 195-220 fused to 1-195.

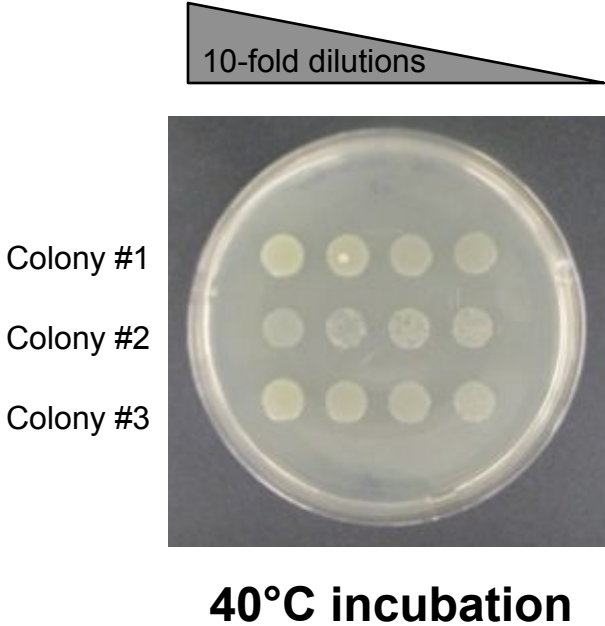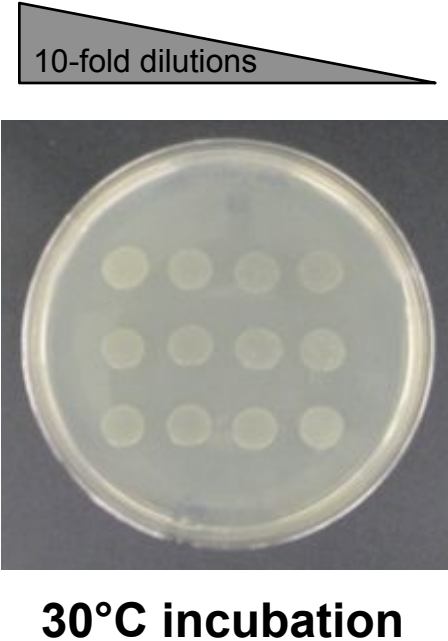

**Figure S5.** Growth of *E. coli* CV2 transformed with a vector that expresses AK residues 29-220 fused to 1-29.

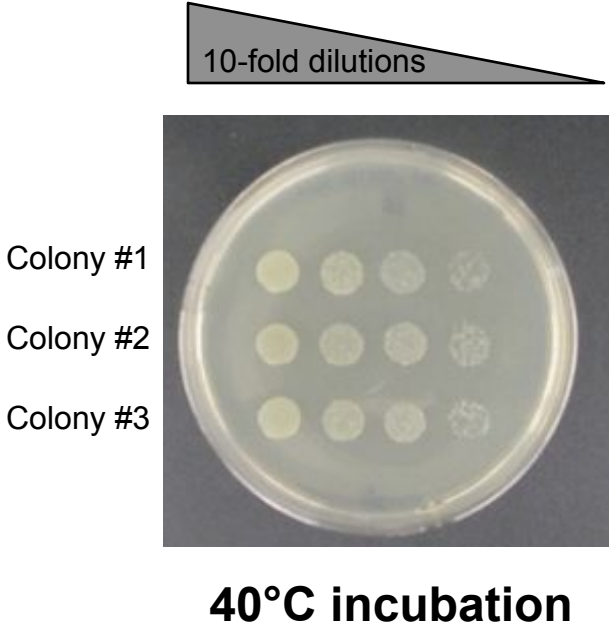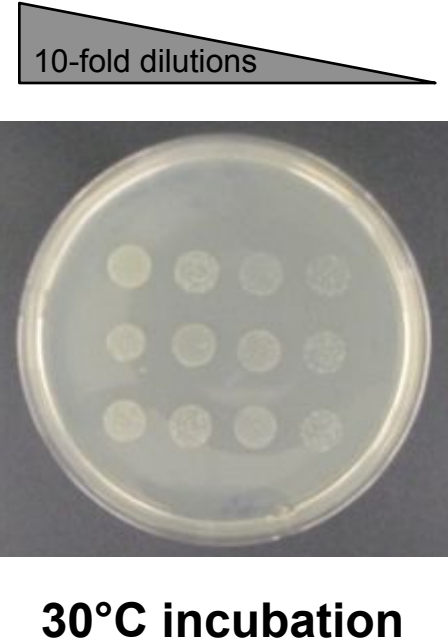



**Figure S6.** Growth of *E. coli* CV2 transformed with a vector that expresses AK residues 184-220 fused to 1-184.

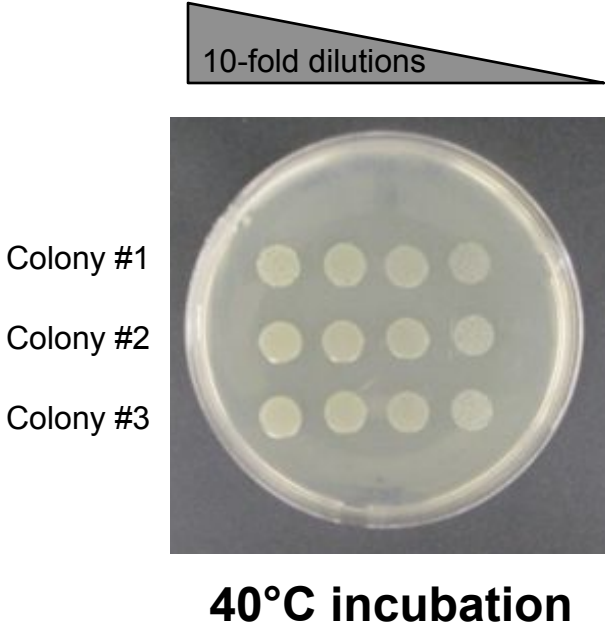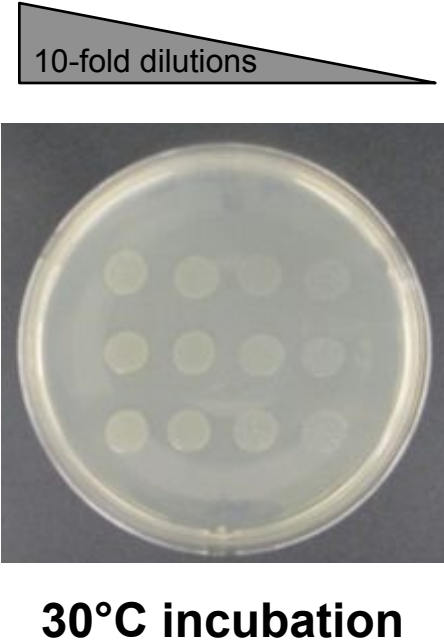

**Figure S7.** Growth of *E. coli* CV2 transformed with a vector that expresses AK residues 41-220 fused to 1-41.

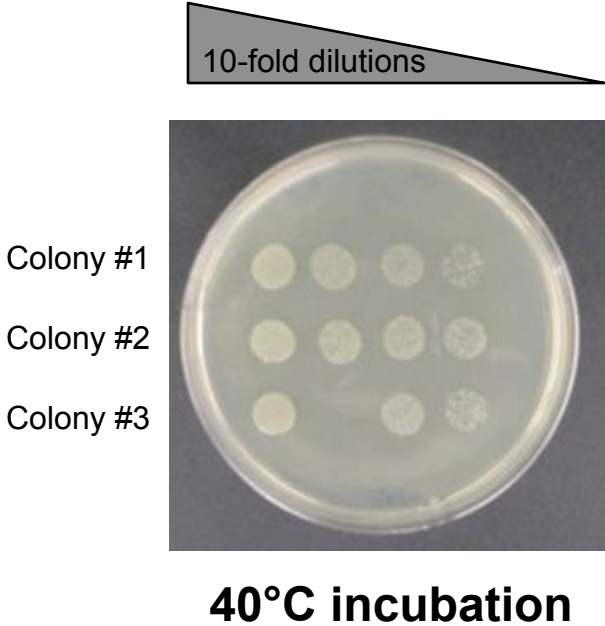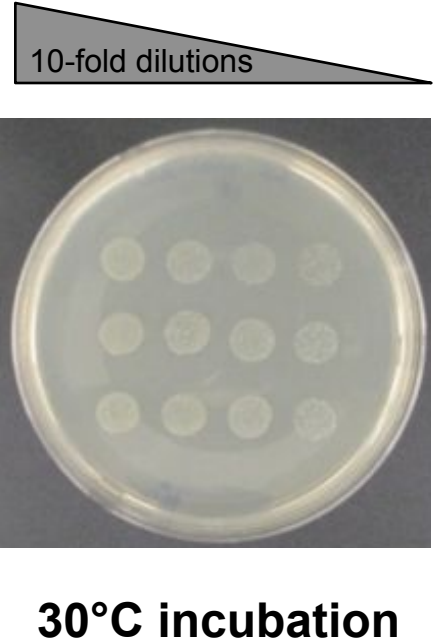

**Figure S8.** Growth of *E. coli* CV2 transformed with a vector that expresses AK residues 209-220 fused to 1-209.

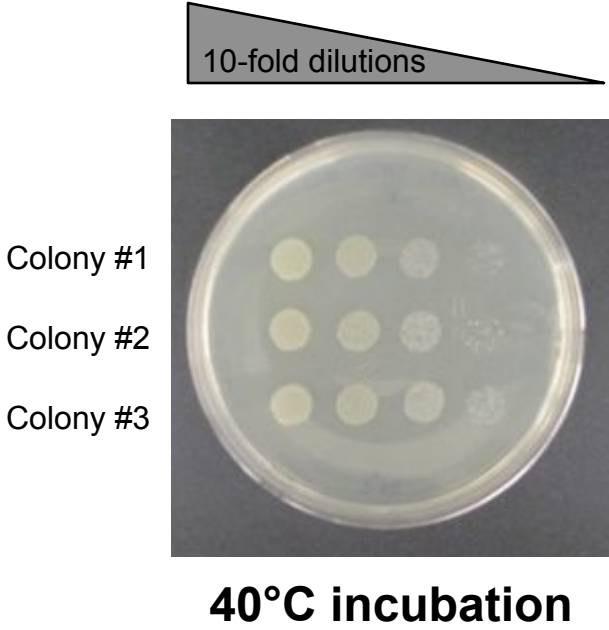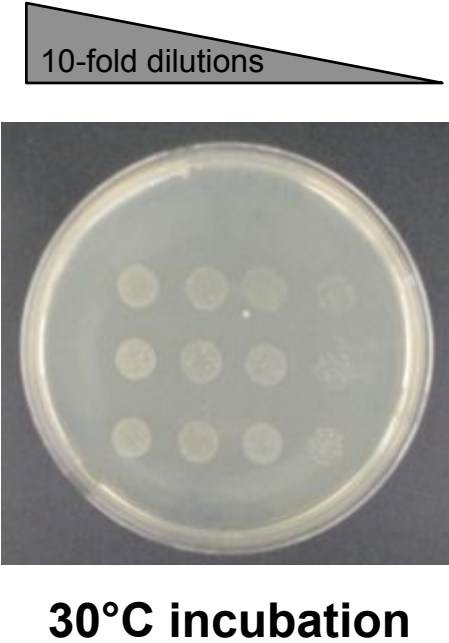

**Figure S9.** Growth of *E. coli* CV2 transformed with a vector that expresses AK residues 207-220 fused to 1-207.

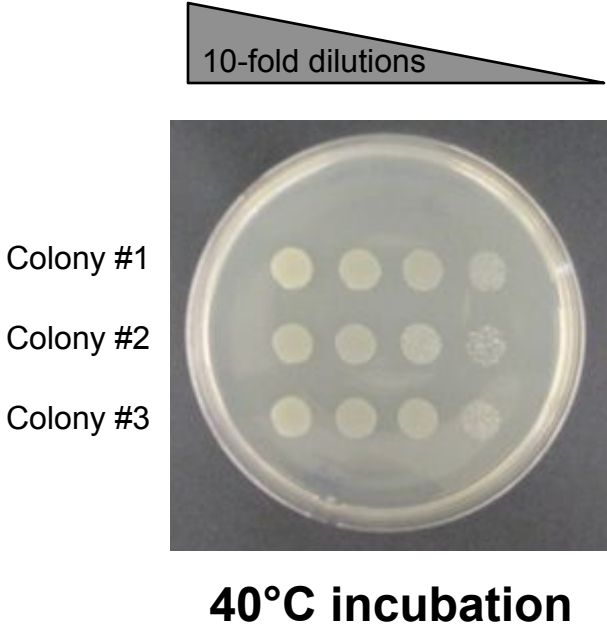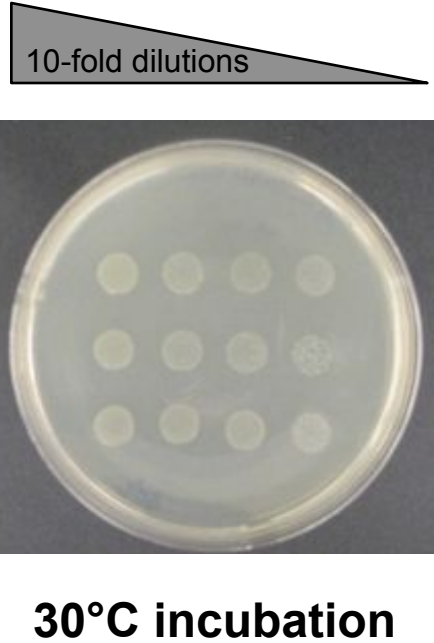

**Figure S10.** Growth of *E. coli* CV2 transformed with a vector that expresses AK residues 2-220 fused to 1-2.

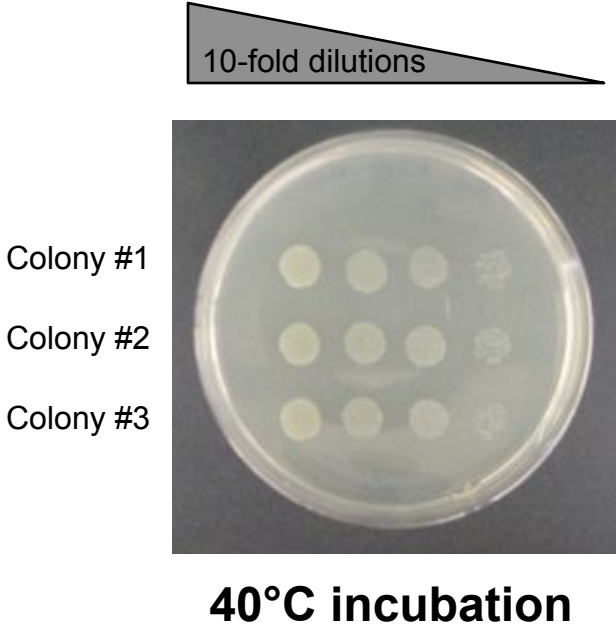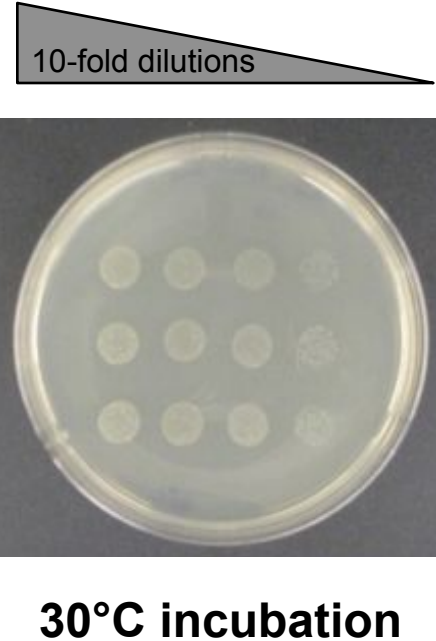

**Figure S11.** Growth of *E. coli* CV2 transformed with a vector that expresses AK residues 113-220 fused to 1-113.

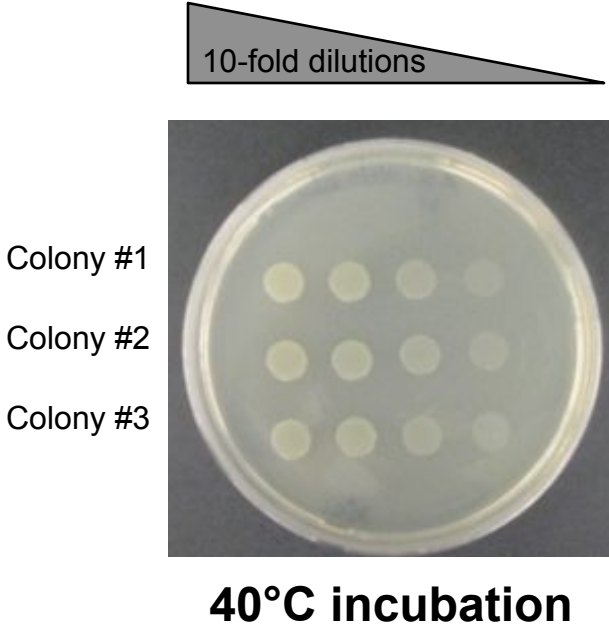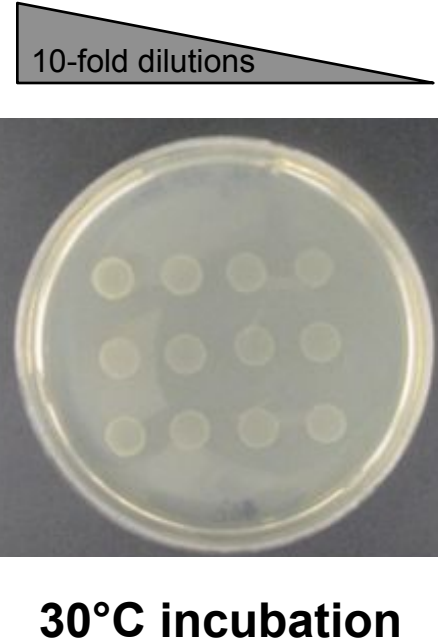

**Figure S12.** Growth of *E. coli* CV2 transformed with a vector that expresses AK residues 217-220 fused to 1-217.

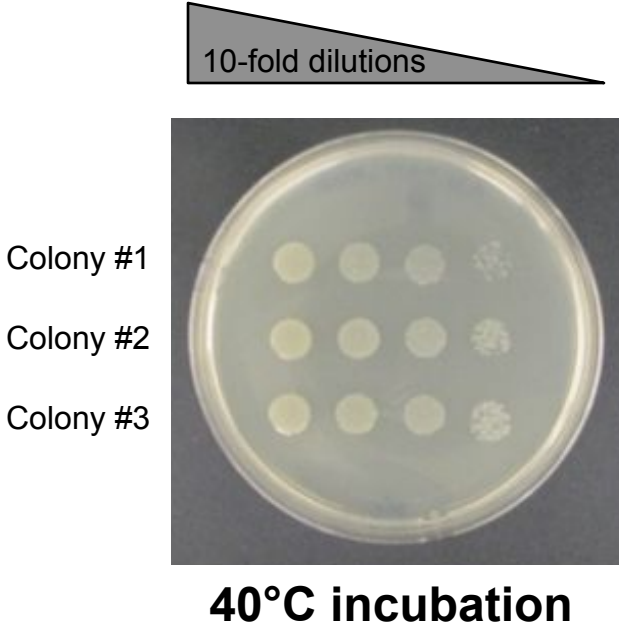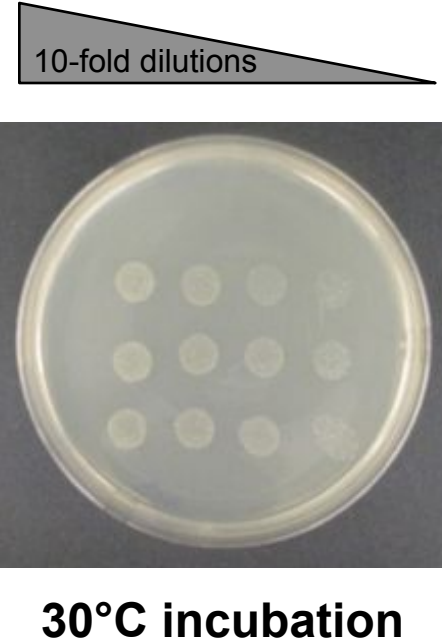

**Figure S13.** Growth of *E. coli* CV2 transformed with a vector that expresses AK residues 179-220 fused to 1-179.

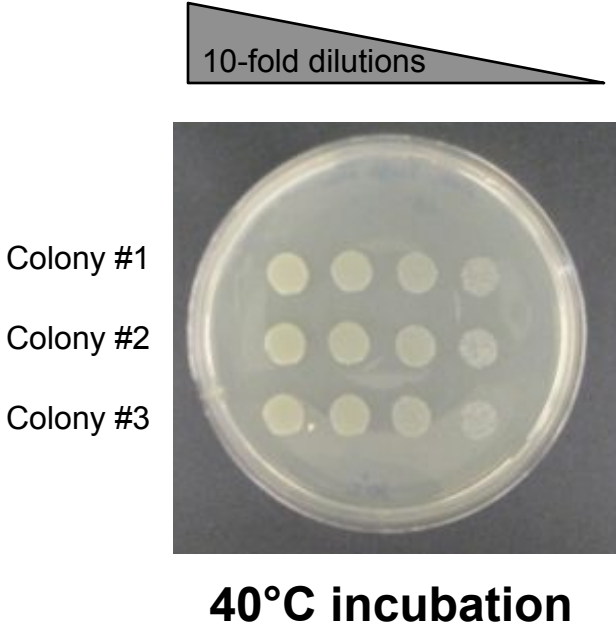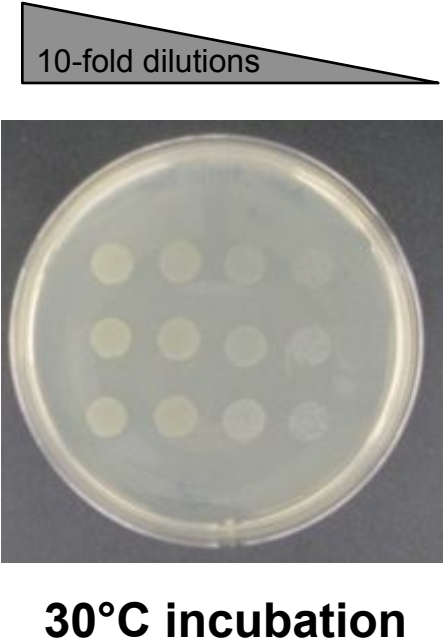



**Figure S14.** Growth of *E. coli* CV2 transformed with a vector that expresses AK residues 201-220 fused to 1-201.

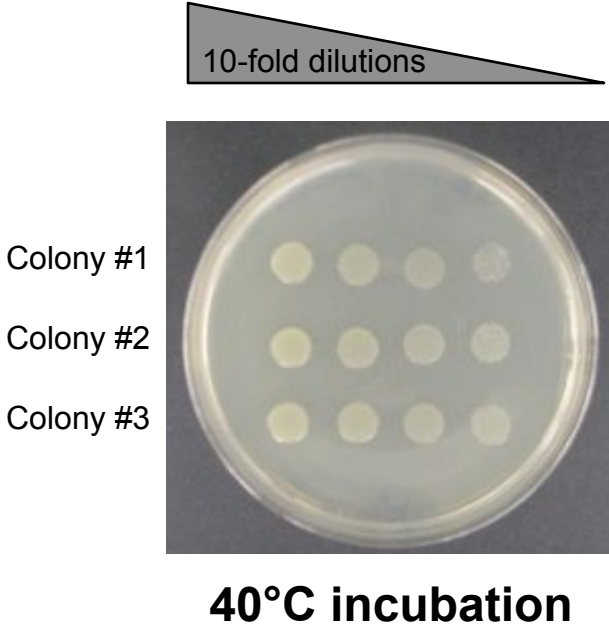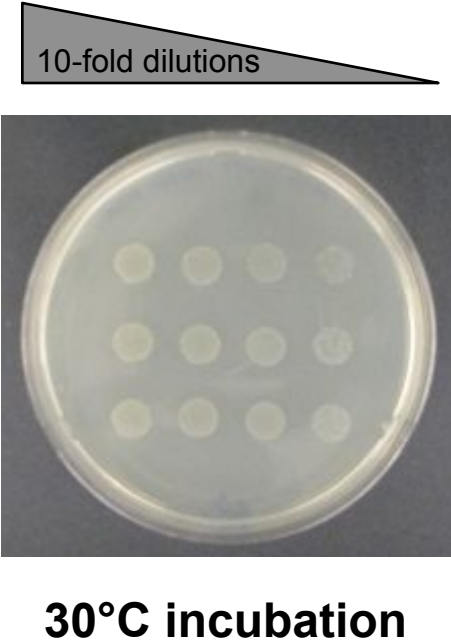

**Figure S15.** Growth of *E. coli* CV2 transformed with a vector that expresses AK residues 5-220 fused to 1-5.

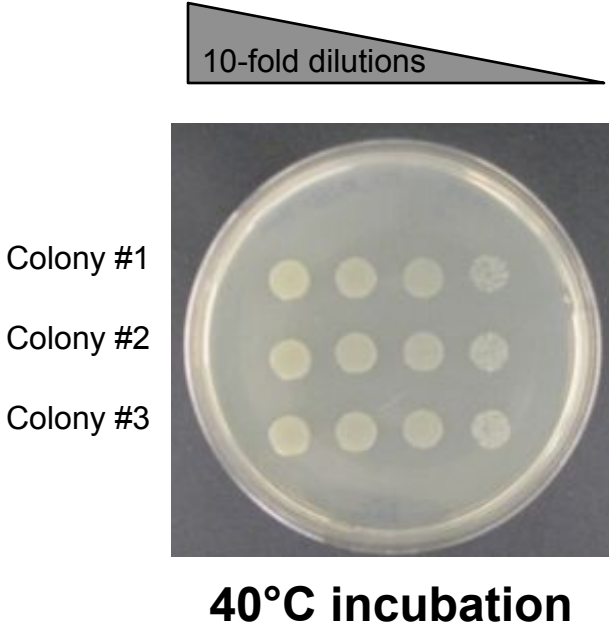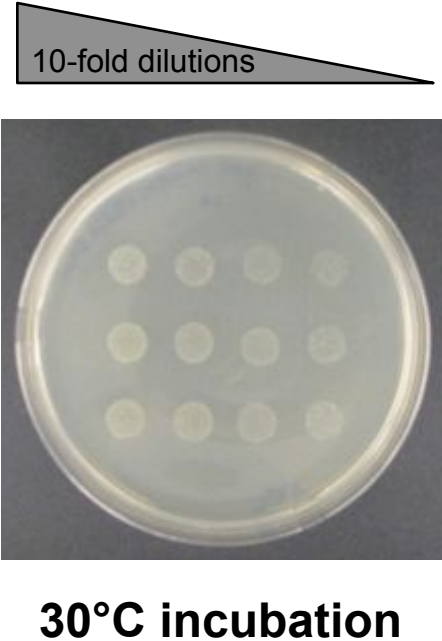

**Figure S16.** Growth of *E. coli* CV2 transformed with a vector that expresses AK residues 103-220 fused to 1-103.

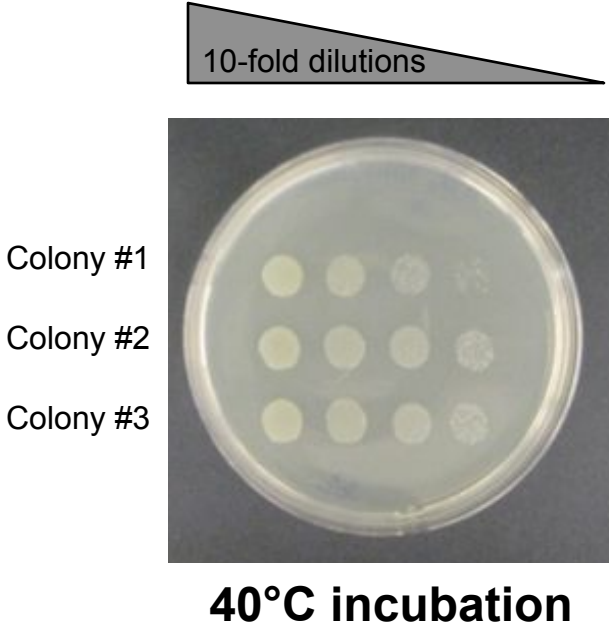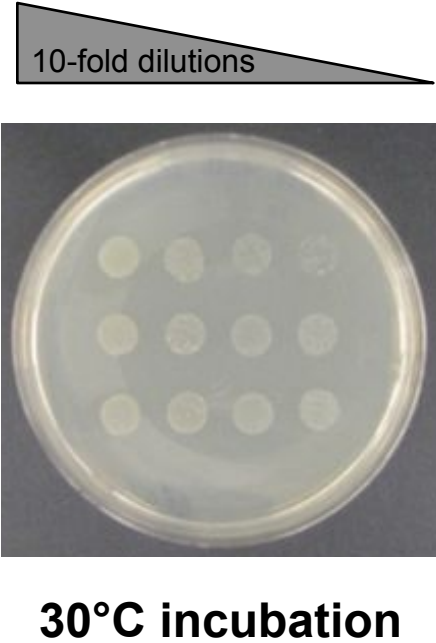

**Figure S17.** Growth of *E. coli* CV2 transformed with a vector that expresses AK residues 142-220 fused to 1-142.

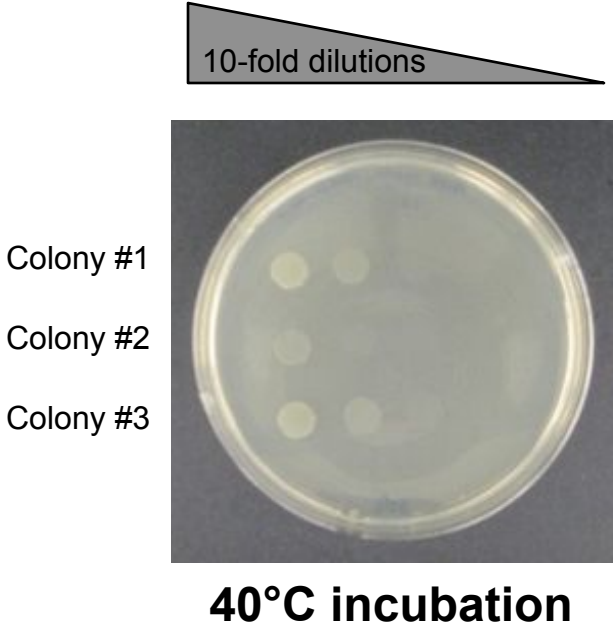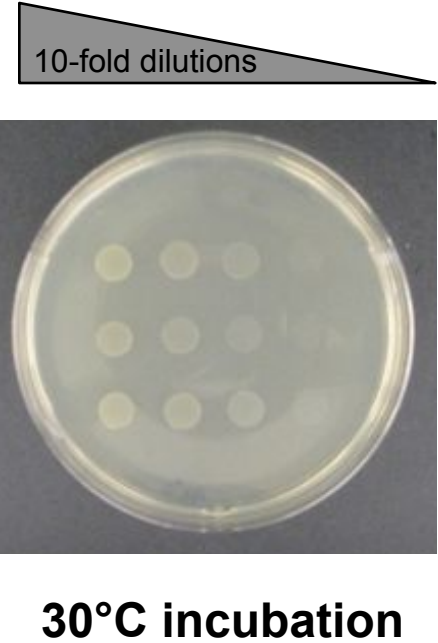

Supplement: supp_gks060_nar-02701-met-k-2011-File006.pdf [file supp_gks060_nar-02701-met-k-2011-File006.pdf]
